# Supplementary material
Source: publisher figshare collection journal article supplement (https://acs.figshare.com/ndownloader/files/11094482)
Supplement: Supplementary file 1 [file 11094482]

## **Supporting Information**

### **Surface modification of polymers for tissue engineering applications: Arginine acts as a sticky protein equivalent for viable cell accommodation**

Poulomi Sengupta<sup>1</sup>, Bhagavatula L. V. Prasad\*<sup>1</sup>

<sup>1</sup> Physical Chemistry Division, CSIR National Chemical Laboratory

Dr. Homi Bhabha Road, Pashan, Pune, 411008, India

Ph: 91-20-25902013; Fax: 91-2025902636; Email: pl.bhagavatula@ncl.res.in

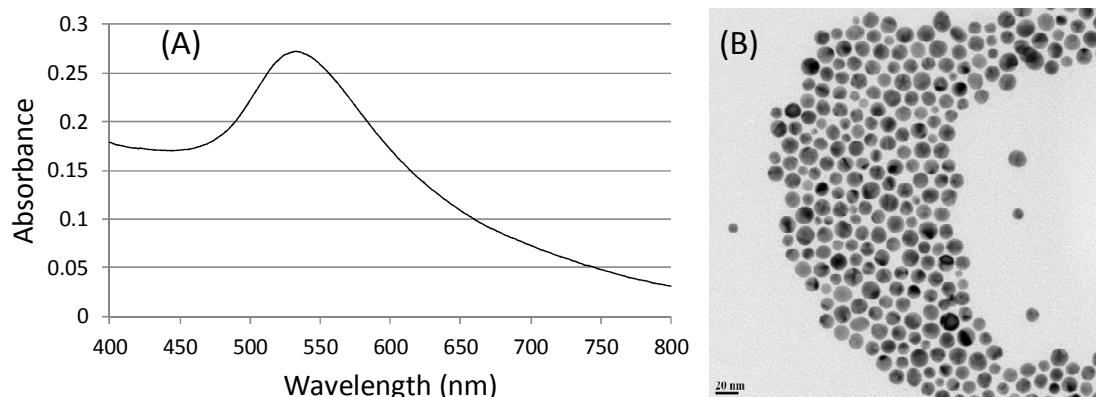

**Figure S1.** UV-Vis trace for citrate stabilized gold nanoparticles A. TEM image of the same B. Scale bar 20 nm.

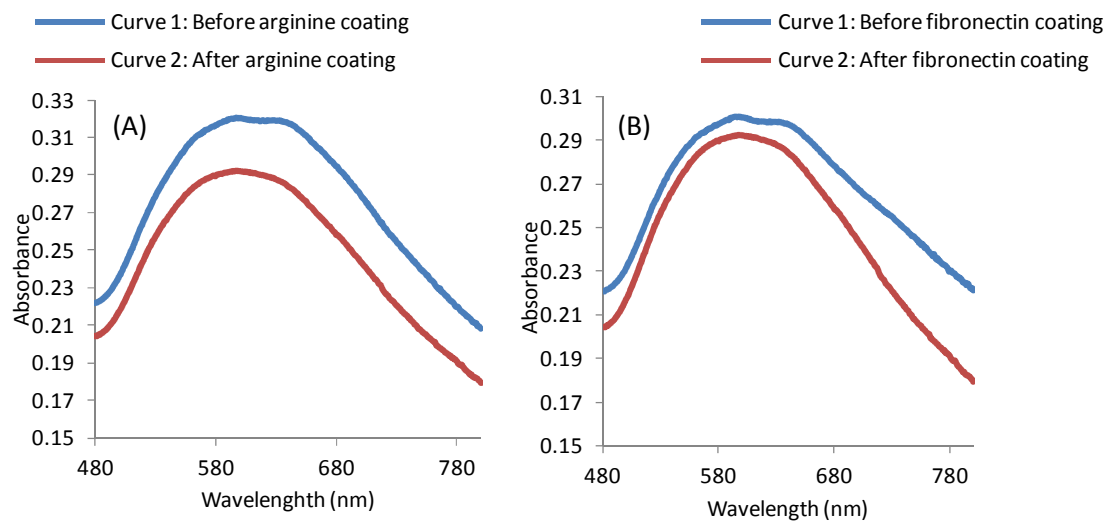

**Figure S2.** Solid state UV traces of A. arginine and B. fibronectin-coated PEI films

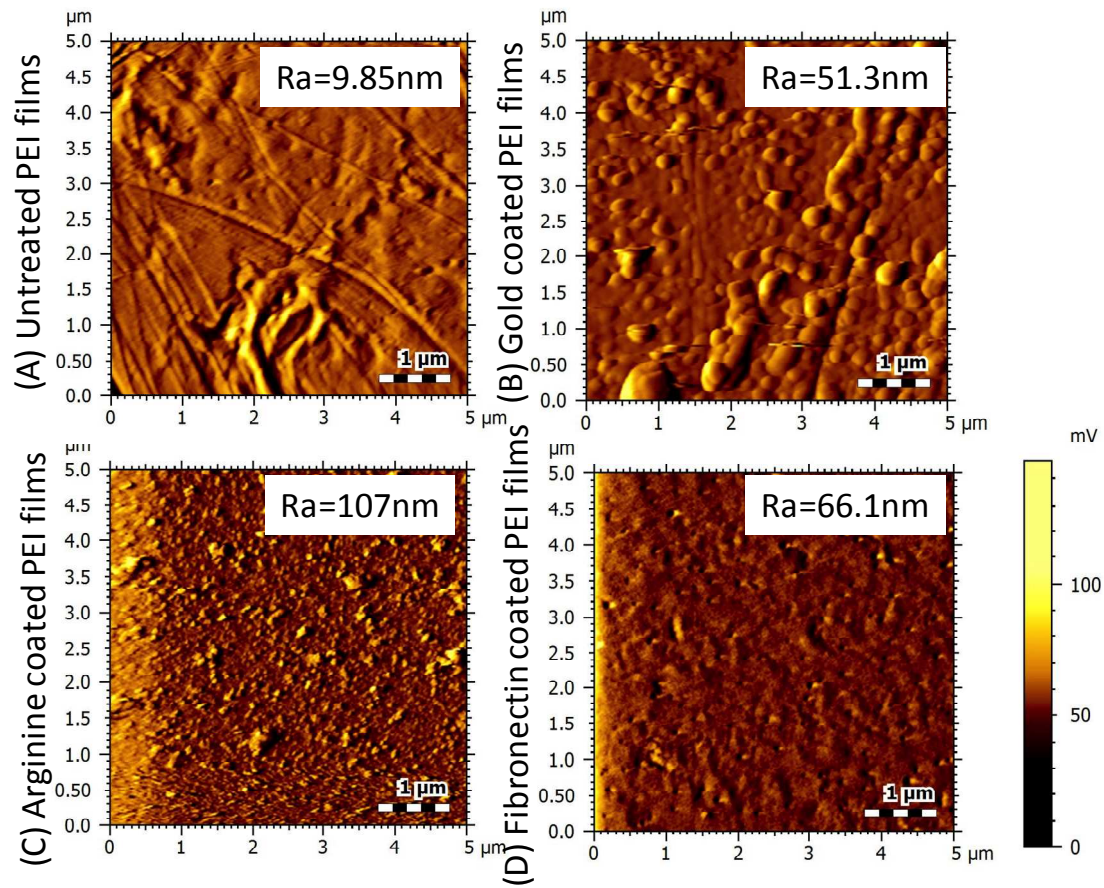

**Figure S3.** AFM images (contact mode) showing topography of surface coated films along with control A, gold B, arginine C, and fibronectin D dipped films. Surface roughness parameters are provided with each individual images.

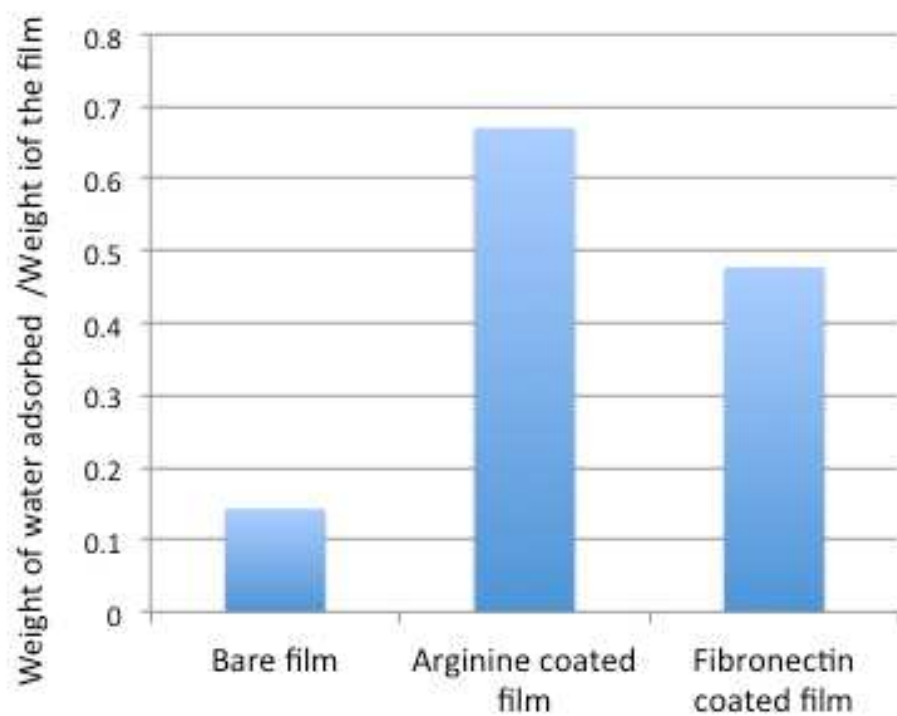

**Figure S4.** Water absorbed on each film is indicated by a plot of weight of water absorbed per unit weight of the film.

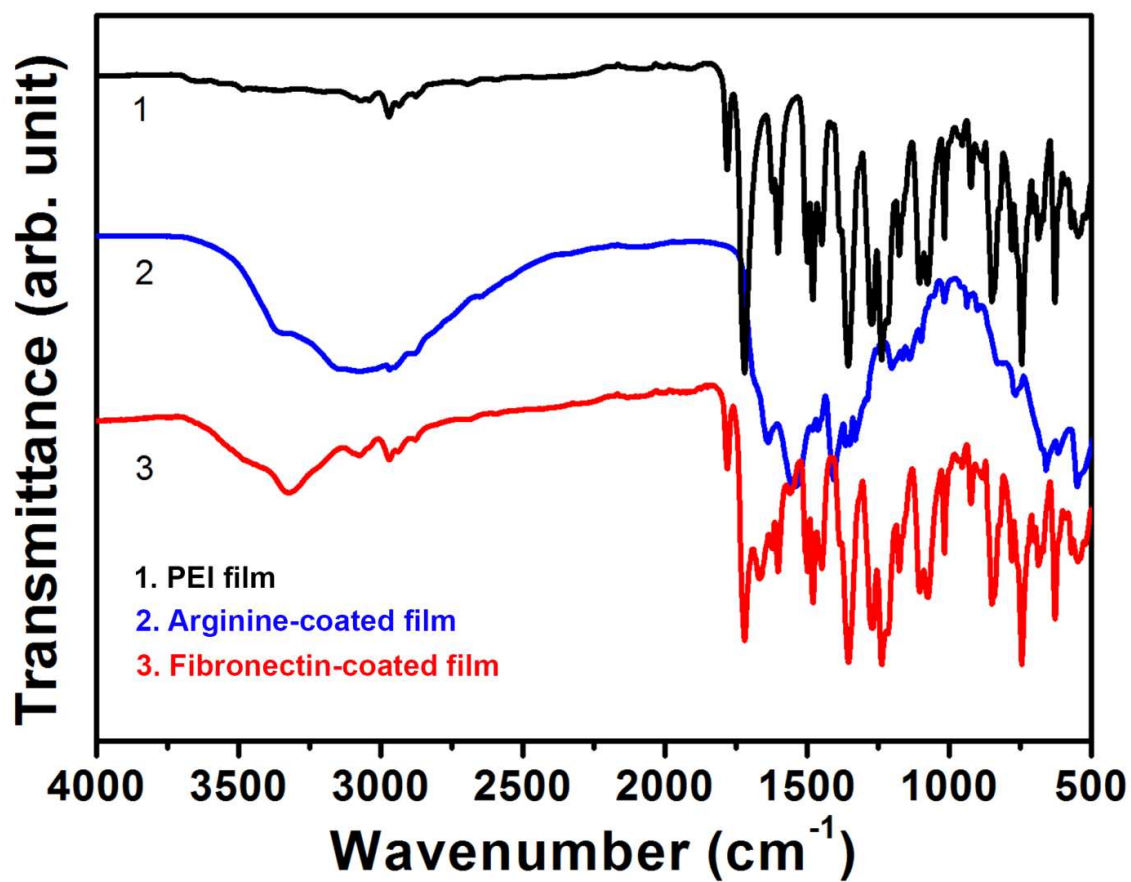

**Figure S5.** IR of differently surface modified films under ATR mode. The relevant region is expanded in main text Figure no. 2.

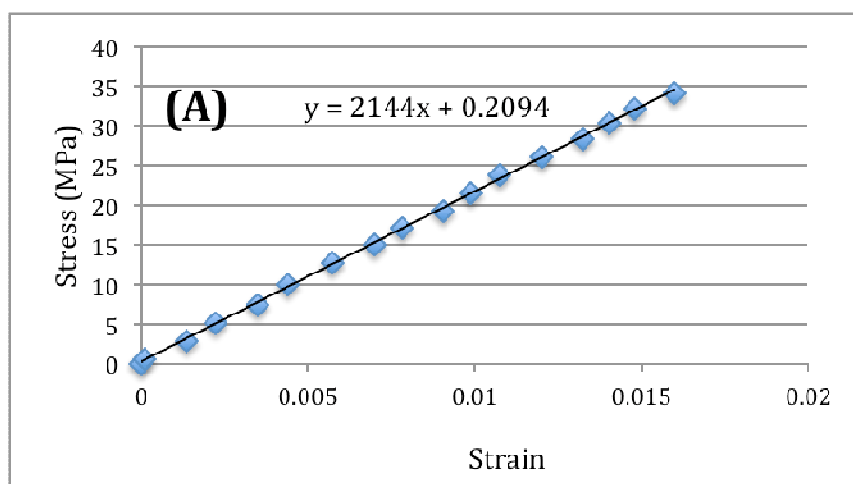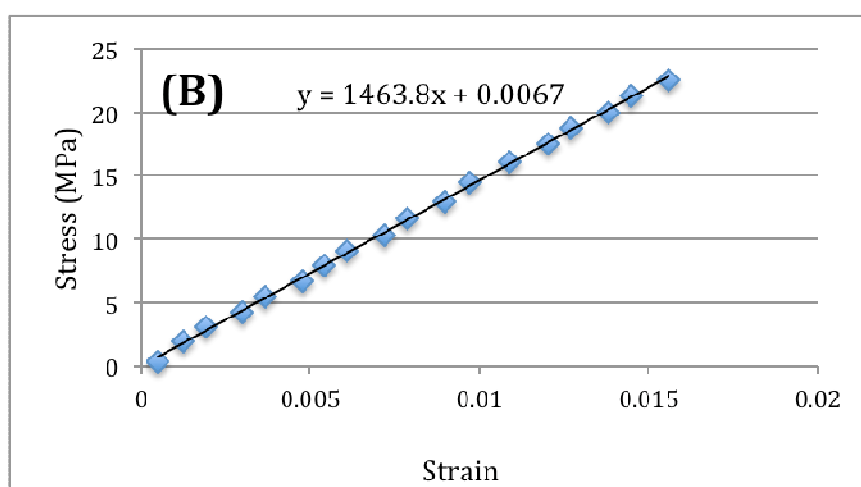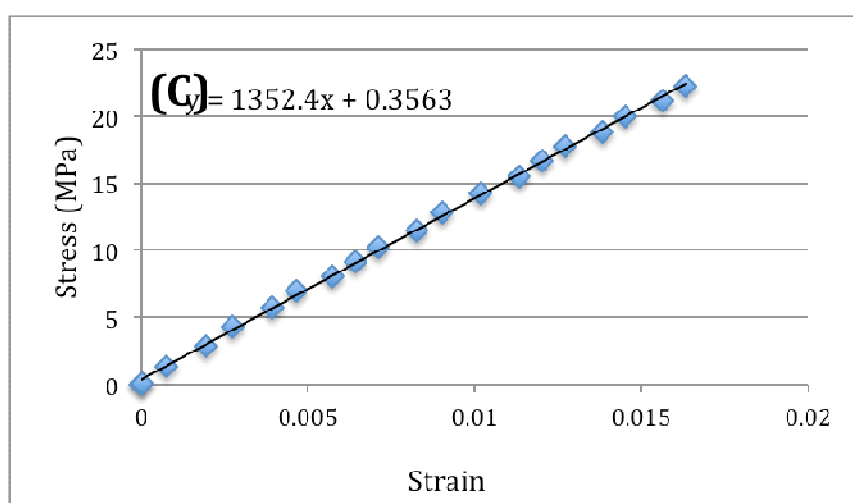

**Figure S6.** Mechanical stability profiles of bare film (A), arginine coated film (B), fibronectin coated film (C)

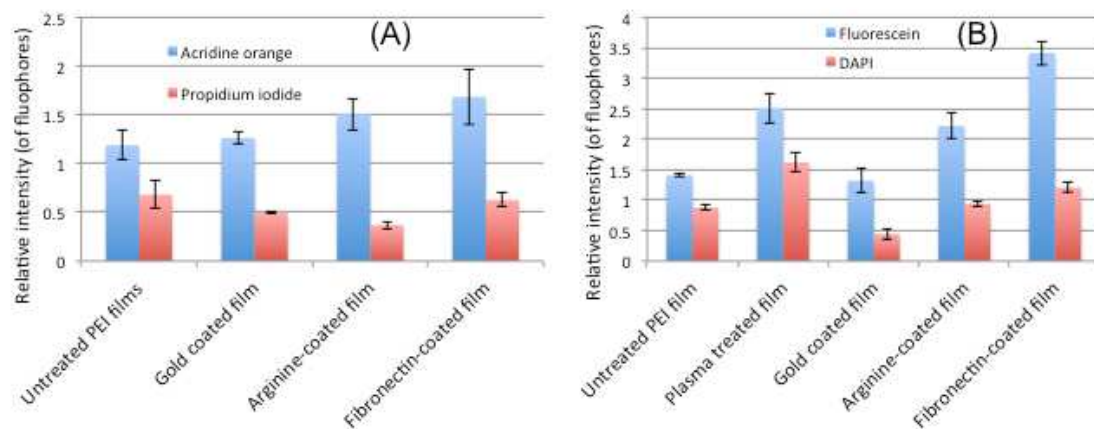

**Figure S7.** Quantification of fluorescent intensities from cells. (A) Acridine orange and propidium iodide from Figure 6. (B) Fluorescein and DAPI intensity from Figure 8.

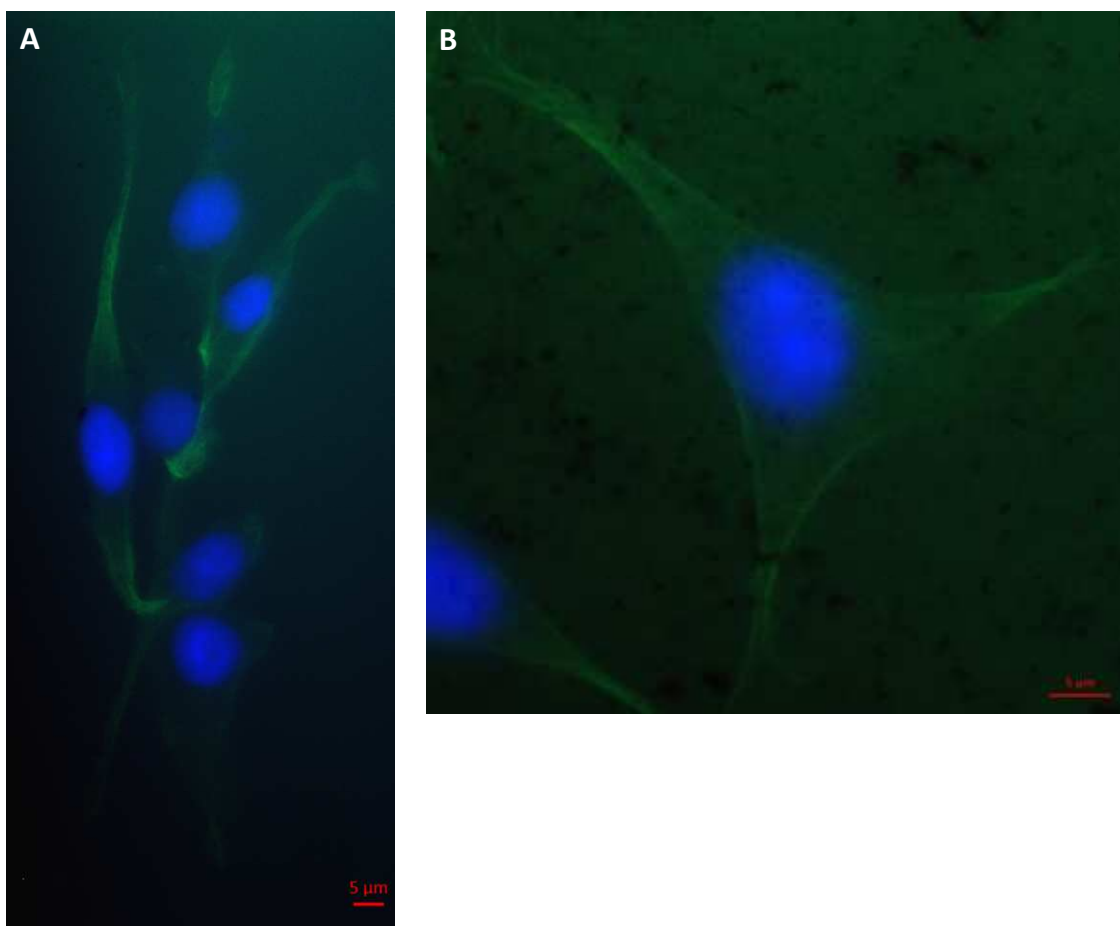

**Figure S8.** Actin cytoskeleton staining of arginine-coated (A) and fibronectin-coated (B) films. Scale bar 5  $\mu\text{m}$
